# Supplementary material for: Identification and spontaneous immune targeting of an endogenous retrovirus K envelope protein in the Indian rhesus macaque model of human disease
Source: PubMed Central journal article supplement (PMC4714462; doi:10.1186/s12977-016-0238-0), 2016-01-15
Supplement: 12977_2016_238_MOESM1_ESM.pdf [file 12977_2016_238_MOESM1_ESM.pdf]

**Figure S1. SERV-K1 proviral sequence.** Nucleotide sequence of SERV-K1 provirus from chromosome 12 of rhesus macaque r02120 is shown. Long terminal repeat sequences (LTRs) as well as coding sequences for Gag, Pro, Pol, and Env open reading frames are annotated. Note Pro and Pol ORFs contain frameshift mutations resulting in premature stop codons, while Gag and Env ORFs appear intact. RF= reading frame.

```

10      20      30      40      50      60      70      80      90      100     110     120
TGTGGGAAAAGAAAGAGATCAGCCGTGTTACTGTGTCTATATAGAAAAGAGTAGACATAAGAGACTCCATCTTGTCTGTAATTTGAGATGCTGTTAATCTGTGACCTACCCCAACCTT
ACACCCCTTTTCTTCTAGTCGGACAATGACACAGATATATCTTTCTTCATCTGTATTCTCTGAGGTAGAACAAGACATAAACTCTACGACAATTAGACTGGGATGGGGTTGGAA
"5' LTR"
130     140     150     160     170     180     190     200     210     220     230     240
GTCCTTGCAAGAGACATGTGCTGTGGTAACTCAAGGTTTAAATGGATTTGGGCGTGCAGGGGTGACTTTGTTCTAGAAAAGCTAGGTATTGTCCAAGGTTTATCCCATGTGATAGGA
CAGGAACGTTCTCTGTACACGACACCATTGAGTTCCAAATTACCTAAAACCCGACGTCCACACTGAAACAAGGATCTTTTCGATCCATAACAGGTTCCAAATAGGGGTACACTATCCT
"5' LTR"
250     260     270     280     290     300     310     320     330     340     350     360
TGAAACAATGTTGCTAAAAGGTTTATCTCAAGGCACAGGATTTACCTTAAACTTATTTCATGTCACAGATCCTTGTCTTATGCTTACTGCTAATTTCTCCCTAAAATGATCCTATT
ACTTTGTTACAACGATTTTCCAAATAGAGTTCCTGCTCTAAATGGAATTTGAATTAAGTACAGTGTCTAGGAACAAGAATACAGAATGACGATTAAGGAGGGGATTTTACTAGGATAA
"5' LTR"
370     380     390     400     410     420     430     440     450     460     470     480
GTCCTGCCACTCCCTTATCTTTAAGATGGTAAAGATAAATATCTATAAACTAAGGAACTCAGAGGCCGTTGCCGGTGGGCTCTGTAAGCTGAGCGCCGGTCCCTGGGCCCCC
CAGGACGGTGAGGGAATAGAAATCTACCATTCTATTAATAGATATTTATGATTCCTTTGAGTCTCCGCCACGGCCGACCCAGGAGACATTCGACTCGCGCCAGGGGACCCGGGG
"5' LTR"
490     500     510     520     530     540     550     560     570     580     590     600
GCTTTTCTTCTATACTTTGTCTGTGCTTATTTCTTTTCTCAAGTCTCTGCTCCACCTTACGAGAAACCCACAGGTGTGGAGGGCAGGCCACCCCTTCACTGTGGTCCCAA
CGAAAAGAAAGAGATATGAAACAGAGACACAGAATAAAGAAAAGAGTTCAGAGAGCAAGGTGGAATGCTCTTTGTGGGTGCCACACCTCCCCGTCCTGGTGGGAAGTAGACCAGGGTT
"5' LTR"
610     620     630     640     650     660     670     680     690     700     710     720
CGTGAAGCTTTTCTTAAGGTGAAGGTACGCTGGAGCGTGGTCACTGAGGACAAGTGCAGCAGAGACTCCCGAGTACGCTACAGTCAGCCTTGGGGTAAAGCTTGTGCGCTCGGAAGAA
GCACCTTCGAAAAGAGATTCACCTTCCATGCGACCTCGCACCAGTGAATCTCTGAGGGCTCATGCAGATGTCAGTCGGAACGCCATTGCAACACGGCAGCTTCTT
730     740     750     760     770     780     790     800     810     820     830     840
CCTAGGTAACAATGGGGCAAACTAAGAGTAAATATGCCTTTATCGCAGCTTTATTAATTTCTTTAAAAGAGGGGAGTTAAAGTCTTACCAAAAATCAATTCAGCTATTTCAA
GGATCCCATTTGTTACCCCGTTTATTCTATTATACGGAGAATAGCGTCAAAATATTTAAGAGAATTTTCTCCCTCAATTCAGAGATGTTTTTAGATTAATGCGATAAAGTT
M G Q T K S K Y A S Y R S F I K I L L K R G G V K V S T K N L I T L F Q>
"GAG"
850     860     870     880     890     900     910     920     930     940     950     960
ACGATAGAGCAGTTTTGTCCATGGTTTCCGGAACAGGGAACCTTAGATCTAAAAGATTGGGAAAAAATGGCAAGAATTAACAAGCAAGCAGGGAAGGTAATAATCATTCCGCTCACA
TGCTATCTCGTCAAAACAGGTACCAAAGCCCTTGTCCCTGAAATCTAGATTTTCTAACCTTTTAAACCGTTTCTAATTTTGTTCGTTCCCTTCCATTTTAGTAAGCGGAGTGT
T I E Q F C P W F P E Q G T L D L K D W E K I G K E L K Q A S R E G K I I P L T>
"GAG"
970     980     990     1000    1010    1020    1030    1040    1050    1060    1070    1080
GTATGGAATGATTGGTTCATTATTAAGTAGCTTTAGAACCTTTCAACAGAGAAGATAGCGTTCCAAATTTCTGATGTCCTTAAAGCTGTGCAGTAGATTGTGAAAAAGAGGCAGGG
CATACCTTACTAACCCAGTAATAATTTTCATCGAAATCTGGTAAAGTTTGTCTTCTTATCGCAAGGTTAAAGACTACAGGGATTTTCGACACGTCATCTAACACTTTTCTCCGTCCT
V W N D W V I I K V A L E P F Q T E E D S V P I S D V P K S C A V D C E K E A G>
"GAG"
1090    1100    1110    1120    1130    1140    1150    1160    1170    1180    1190    1200
ATAGAATCCCGAAAAGGAAAGAAAGTTACACTGTGAATGTGTATCAGAGCCGGCTATGGCTCGGTCAACGCAAAATGTTGACGATAATCAATTACAGGAGGTAGTATATCTGAAACG
TATCTTAGGGCTTTCCCTTTCCCTTCAAGTGTGACACTTACACATAGTCTCGGCCGATACCGAGCCAGTTGCGTTTTACAACCTGCTATTAGTTAATGTCTCCATCATATAGGACTTTGC
I E S R K G K E S S H C E C V S E P A M A R S T Q N V D D N Q L Q E V V Y P E T>
"GAG"
1210    1220    1230    1240    1250    1260    1270    1280    1290    1300    1310    1320
TTAAATTAAGAAAAGAAATCCAGAATAGCAGAGCCATCAGAGTCTAAACCAGATGGCCAACTGCTCTTCCAGCAGCTCAAATGCCTGTAACCTTTACAACCTCAATTCAGGTTTAAA
AATTTAATCTCTTTTTTGTAGTCTTAATCGTCTCGGTAGTCTCAGATTTGGTGTACCGGTTGACGAGAAGGTCGTCGAGTTTACGGACATTTGAAATGTTGGAGTTTACGTTCCAAATTT
L K L E E K N P E L A E P S E S K P R W P T A L P A A Q M P V T L Q P Q M Q V K>
"GAG"
1330    1340    1350    1360    1370    1380    1390    1400    1410    1420    1430    1440
CAAGTACAACTGCAAAAGAAGATCAATAGAAAAGATAGAGTTTCTGTGATGGCAATGCCATTCCAAATGCAGTGTCCACAATATCAGCCGGTAGAAGATAAGACCCAGCCGCGCAGTA
GTTTCATGTTGACGTTTTCTTCTAGTTTATCTTTTCTATCTCAAAGACAGTACCGTTACGGTAAGGTTTACGTCACAGGTGTTATAGTCGGCCATCTTCTATTCTGGGTGGCGGTCAT
Q V Q T A K E D Q I E K D R V S V M A M P F Q M Q C P Q Y Q P V E D K T Q P P V>
"GAG"
1450    1460    1470    1480    1490    1500    1510    1520    1530    1540    1550    1560
GCCTATCAACTGCTGCCAGCCAACTGTGGTATCGGTTGCCCCAGAAAATCTGTGTGGACAGCCAGGAACATTTCCAGCGCCACAGGGCAGGGTACCATATCTCAACCGCCACC
CGGATAGTTATGACCGACGGTCGGCTTGACACCATAGCCAAACGGGGTCTTTTAGACACACCTGTCCGGTCTTTGAAAGGTCGCGGTGTCCTCCGTCATGATAGGAGTTGGCGGGTGG
A Y Q Y W L P A E L W Y R L P P E N L C G Q P G T F P A P Q G R V P Y P Q P P T>
"GAG"
1570    1580    1590    1600    1610    1620    1630    1640    1650    1660    1670    1680
ATGAGACTTAATCTACGACTGCCTAGTACACAGGGTAGTGCCTTACATAAAATTTATGATGAGGCAAGAAAACAGGAGATTTGAGGCGTGGCAATTTCCAGTAATATTAGAAGCA
TACTCTGAATTAGGATGTCGTCGACGGATCATGTGCCATCAGCAGATGATTTAATAACTACTCCGTTCTTTGTTCTCTATAACTCCGACCGGTTAAGGGTCAATTAATCTTCTGT
M R L N P T A L P S T Q G S A L H K I I D E A R K Q G D I E A W Q F P V I L E A>
"GAG"
1690    1700    1710    1720    1730    1740    1750    1760    1770    1780    1790    1800
AGACCCTGGAGAAGGGGCCAAGAGGGGAGAGCTTCCCGTAGCTGAAGCCAGATATAAGTCTTTTTCTATAAAAATGCTAAAAGAATGAAAGAGGGAGTAAAACAGTATGGACCCAA
TCTGGTGGACCTTCCCGGGTCTCCCTCTCGAAGGGCATCGACTTCGGTCTATATCAGAAAAGATATTTTACGATTTTCTTACTTTCTCCCTCATTTTGTACATCTGGGTTG
R P P G E G A Q E G E L P V A E A R Y K S F S I K M L K E M K E G V K Q Y G P N>
"GAG"
1810    1820    1830    1840    1850    1860    1870    1880    1890    1900    1910    1920

```



3490 3500 3510 3520 3530 3540 3550 3560 3570 3580 3590 3600  
CCATTATACAGCCCAAGTCAAAAAATCATAACTAAGTGGGATATATACCAGGAAAGGGTTAGGAAAAATGAAATGGCATTAAAGTCCCAATTGAGACTAAGAAAAATCAAGAA  
GGTAATATGTCGGGGTTCAGTTTTTAGTATTGATTTACCTATATATGGTCCTTCCCAATCCCTTTTACTTTTACCAGTAAATTCAGGGTTAACTCTGATTCTTTTTAGTTCTT  
P L Y S P T S Q K I I T K M G Y I P G K G L G K N E N G I K V P I E T K K N Q E >  
"PROTEASE RF2" >  
E K S R >

3610 3620 3630 3640 3650 3660 3670 3680 3690 3700 3710 3720  
AGAAAAGGAATAGGGTATCCTTTTTAGGGCGGCCACTGTAGCGCCTCTAAACCCATTCCATTAACCTGGAAAAACAGAAAAACCGGTATGGGTAAATCAGTGGCCGCTACCGAAGCAAA  
TCCTTTCCCTTATCCCATAGGAAAAATCCCGCGGGTGACATCGCGGAGGATTTGGGTAAGGTAATGAACCTTTTGTCTTTTGGCCATACCCATTAGTACCAGGCGATGGCTTCGTTT  
R K G I G Y P F \* >  
"PROTEASE RF2" >  
K K R N R V S F L G A A T V A P P K P I P L T W K T E K P V W V N Q W P L P K Q >  
"POL RF1" >

3730 3740 3750 3760 3770 3780 3790 3800 3810 3820 3830 3840  
AACTGGAGGCTTTACATTCATTAGCAAGGAACAATTTAAAAAGGACACATTGAGCCTTATTCTCACCTGGAATTCTCTGTATTTGTAATACAGAAAAATCAGGCAATGGCGTA  
TTGACCTCCGAAATGTAAGTAATCGTTTCTGTTAAATTTTTCTGTGTAACCTGGAAAGTAAAGTGGGACCTTAAAGAGGACATAAACATTATGCTTTTTAGTCCGTTTACCGCAT  
K L E A L H S L A K E Q F K K G H I E P S F S P W N S P V F V I Q K K S G K W R >  
"POL RF1" >

3850 3860 3870 3880 3890 3900 3910 3920 3930 3940 3950 3960  
TGTTAATGGACTTAAGAGCCGTAATGCTGTAATTCACCCATGGGGCCTCTTCAACCCGGATTGCCTCTCCGGCCATGATCCAAAAGACTGGCCTTTAATTATAAATGATCTTAAGG  
ACAATTACCTGAATTCCTGGCATTACGACATTAAGTTGGGTACCCCGGAGAAGTTGGGCTAACGGGAGAGGCGGTAAGTGGTCTTCTGACCCGAAATTAATTAAGTAAATTC  
M L M D L R A V N A V I Q P M G P L Q P G L P S P A M I P K D W P L I I I D L K >  
"POL RF1" >

3970 3980 3990 4000 4010 4020 4030 4040 4050 4060 4070 4080  
ATTGCTTTTTTACCATTCTCTGGCAGAGCAAGATTGTGAAAAATTTGCCTTTACTATACCAGCCATAAAATAAAGAACCAGCCACCAGGTTCAGTGGAAAGTACTACCTCAGGGAA  
TAACGAAAAATGGTAAGGAGACCGTCTCGTTCACACTTTTTAAACGGAAATGATATGGTCGGTATTTATTATTCTTGGTCCGTTGGTCCAAGGTCACCTTTCATGATGGAGTCCCTT  
D C F F T I P L A E Q D C E K F A F T I P A I N N K E P A T R F Q W K V L P Q G >  
"POL RF1" >

4090 4100 4110 4120 4130 4140 4150 4160 4170 4180 4190 4200  
TGCTTAATAGTCCAACATTTGTCAAACCTTTCGTAGGTCAGTCTTCAACCCAGTGTAGAGACAAATTTTCAGATTGTTATATCATTCACTATATTGATGATTTTTATGTCTGCAGAAA  
ACGAATTATCAGTTGATAAACAGTTTGAAGCATCCAGTTCAGGAAGTTGGTCAACTCTCTGTTTAAAGTCTAACATATAGTAAGTATATAACTACTATAAAAATACACGACGCTTT  
M L N S P T I C Q T F V G Q V L Q P V R D K F S D C Y I I H Y I D D I L C A A E >  
"POL RF1" >

4210 4220 4230 4240 4250 4260 4270 4280 4290 4300 4310 4320  
CAAGAGAAAAATTAATGACTGTACACATTTCTGCAAGCAGAGGTTGCCAACCGCAGGACTAACAAATAGCATCGGATAAGTCAAAACCTCTGCTCTTTTTCATTATTTAGGGATGCGAA  
GTTCTCTTTTTAATTAAGTCAATGTAAGACGTTTCGTCCTCAACCGTTTCGTCCTGATTTGTTATCGTAGCCTATTCTAGGTTTGGAGACGAGAAAGTAAATAATCCCTACGCTCT  
T R E K L I D C Y T F L Q A E V A N A G L T I A S D K I Q T S A P F H Y L G M Q >  
"POL RF1" >

4330 4340 4350 4360 4370 4380 4390 4400 4410 4420 4430 4440  
TAGAAAAGTAGAAAAATTAAGCCACAAAAATAGAAAATAGAAAAGATACCTTTAAAAACTTTAAATGACTTTCAAAAATTTGTTAGGCGATTAATTTGGATTCCGGCAACTCTAGGCATT  
ATCTTTTCACTTTTTAATTCGGTGTTTTTATCTTTATCTTTTCTATGAAATTTTGAATTTACTGAAAGTTTTAAACAATCCGCTATAATTAACCTAAGCCGGTTGAGATCCGTAA  
I E K \* >  
R K I K P Q K I E I R K D T L K T L N D F Q K L L G D I N W I R P T L G I >  
"POL RF2" >

4450 4460 4470 4480 4490 4500 4510 4520 4530 4540 4550 4560  
CCTACTTATGCCATGTCAAATTTGTTCTCTATCCTAAGAGGAGATCCAGACTTAAATAGTAAAAGAATATTAAACCCAGAGGCAACAAAAGAAATTAATTAGTGGAAAGAAAAATTCAG  
GGATGAATACGGTACAGTTTAAACAAGAGATAGGATTTCTCTCTAGGCTGAATTTATCATTTTCTTATAAATTTGGGGTCTCCGTTGTTTTCTTTAATTTAATCACCTTCTTTTTAAGTC  
P T Y A M S N L F S I L R G D P D L N S K R I L T P E A T K E I K L V E E K I Q >  
"POL RF2" >

4570 4580 4590 4600 4610 4620 4630 4640 4650 4660 4670 4680  
TCAGCGCAAATAATAGGATAGATCCTTTAGCCCACTCCAACCTTTTGTATTTTGTCTACTACACATTTCTCCAACAGGCATCATTATTCAAAACACTGATCTTGTGGAGTGGTCATTTCTT  
AGTCCGGTTTATTTATCTATCTAGGAAATCGGGTGAGGTTGAAAACTAAAAACGATGATGTGAAGAGGTTGTCGCTAGTAATAAGTTTTGTGACTAGAACACCTCACCAGTAAAGAA  
S A Q I N R I D P L A P L Q L L I F A T T H S P T G I I I Q N T D L V E W S F L >  
"POL RF2" >

4690 4700 4710 4720 4730 4740 4750 4760 4770 4780 4790 4800  
TCTCACAGTACAATTAAGACTTTTACATTTGACTTGGATCGAATAGCTACATTAATTTGGTCAGGCAAGATTACGGATAATAAAATTTGTGGTAAATGACCCAGACAAAAATAGTTGTTCTT  
AGAGTGCATGTTAATTTCTGAAAATGTAACATGAACCTAGCTTATCGATGTAATTAACCGTCCGTTCTAATGCCTATTATTTAAACACACCATTACTGGGCTGTTTTATCAACAAGGA  
S H S T I K T F T L Y L D R I A T L I G Q A R L R I I K L C G N D P D K I V V P >  
"POL RF2" >

4810 4820 4830 4840 4850 4860 4870 4880 4890 4900 4910 4920  
TTAACCAAGGAACAAGTTAGGCAAGCCTTTATCAATTTCTGGTGCATGGCAGATTGGCCTTGCTAATTTTGTGGGATTTATTGATAATCATTACCCAAAAACAAAAATCTCCAGTTTATA  
AATGGTTCTTGTTCATTCGTTTTCGAAATGTTAAGACCACGTAACCTTAAACGGAAATTTACGAGACTGCATATAAATGACTACCAAGGTCGTTTACCTTTTTCGCGAATGTCGATTTTCTCGCT  
L T K E Q V R Q A F A I N S G A W Q I G L A N F V G V I D N H Y P K T K I F Q F L >  
"POL RF2" >

4930 4940 4950 4960 4970 4980 4990 5000 5010 5020 5030 5040  
AAATGACTACTTGGATTTTACCTAAAATCACCAGACATGAGCCTTTAGAAAAATGCTGACAGATTTTACTGATGGTCCAGCAATGGAAAAACGGCCTTACACAGGCAAAAAAGAGCGA  
TTAATGTTTGGTCAACCAATGATTTAGTGGTCTGACTCGGAAATCTTTACGAGACTGCATATAAATGACTACCAAGGTCGTTTACCTTTTTCGCGAATGTCGATTTTCTCGCT  
K L T T W I L P K I T R H E P L E N A L T V F T D G S S N G K A A Y T G P K E R >  
"POL RF2" >

5050 5060 5070 5080 5090 5100 5110 5120 5130 5140 5150 5160  
GTAATCAAAACTCAGTATCAATCAGCTCAAAAGAGCAGGTTGGTTGGCAGTTCATCAGTGTTCACAGTTTAAATCAACCTGTTAATATTATATCAGATTCTGCATATGATGACAGGCA  
CATTAGTTTGGTCAATGATTTAGTGGTCTGACTCGGAAATCTTTACGAACTGCAATGTTTCAAAATGTTTGGACAATATAAATAGTCAAGACGTATACATCATGTCGCA  
V I K T Q Y Q S A Q R A E L V A V I T V L Q D F N Q P V N I I S D S A Y V V Q A >  
"POL RF2" >

5170 5180 5190 5200 5210 5220 5230 5240 5250 5260 5270 5280

ACAAGGGATGTTGAGACAGCTCTAATTAATATAGCATGGATGATCAAGTTAAACCAAGTGTGTTAATTTATACAACAACTGTAAGAAAAAGAAATTTCTCATTTTATATTACTCATATT  
TGTTCCCTACAACCTGTGCGAGATTAATTTATATCGTACCTACTAGTCAATTTGGTCAACAAATAAATAATGTTGTTTGACATTCTTTTTCTTAAGAGTAAAAATAATGAGTATAA  
T R D V E T A L I K Y S M D D Q L N Q L F N L L Q Q T V R K K N F S F Y I T H I >  
"POL RF2" >

5290 5300 5310 5320 5330 5340 5350 5360 5370 5380 5390 5400  
CGAGCACACTAATTTGCCAGGACCTTAACTATAGCAAATGAACAGCTGACTTACTGGTATCCTCTGCATTTCATAAAGACACAAGAATTCATGCTTTGACTCATGTAATGACAGCA  
GCTCGTGTGATTAACGGTCCGAAATGATATCGTTTACTGTTGCGACTGAATGACCATAGGAGACGTAAGTATTTTCGTTTCTTGAAGTACGAACTGAGTACATTTACGTCGT  
R A H T N L P G P L T I A N E Q A D L L V S S A F I K A L Q E L H A L T H V N A A >  
"POL RF2" >

5410 5420 5430 5440 5450 5460 5470 5480 5490 5500 5510 5520  
GGTTAAAAACAAATTTGATGTCACATGGAAACAGGCAAAAGATATTGTACGACATTGCACCCAGTGTCAAGTACTACACCTGCCCACTCAAGAGGCGAGGAGTAAATCCAGAGGCTG  
CCCAATTTTTGTTAAACTACAGTGTACCTTTGTCGTTTTCTATAACATCGTGTAAACGTTGGTGCACAGTTCATGATGTGGACGGGTGAGTTCCCTCCCTCACTTTAGGGTCCAGAC  
G L K N K F D V T W K Q A K D I V R H C T Q C Q V L H L P T Q E A G V N P R G L >  
"POL RF2" >

5530 5540 5550 5560 5570 5580 5590 5600 5610 5620 5630 5640  
TGTCCTAATGCATTATGGCAATGGATGTTACCCATGTACTCTTATTTGGAAATATCATATGTTTCATGTAACAGTGTGATCTTATTCACATTTTCATATGGGCAACATGCCAGACAGGA  
ACAGATTACGTAATACCGTTTTGTAATAATAGAACAACAGACATTACCCCTCAAGTCTTTTTAATAGTATACAAGTACATTTGCAACTATGAATAAGTGAAGTAAACCGTTGACGGTCTGTCCT  
C P N A L W Q M D V T H V P S F G K L S Y V H V T V D T Y S H F I W A T C Q T G >  
"POL RF2" >

5650 5660 5670 5680 5690 5700 5710 5720 5730 5740 5750 5760  
GAAAGTACTTCCCATGTTAAAAACATTTATTATCTTGTGTTGCTGTAATGGGAGTTCAGAAAAATTAACACTGACAATGGACCAGGTTATTGTAGTAAAGCTTTCCAAAAATCTTA  
CTTTCATGAAGGGTACAATTTTTGTAATAATAGAACAACAGACATTACCCCTCAAGTCTTTTTAATTTGACTGTTACCTGGTCCAAATAACATCATTTCGAAAGGTTTTTAAGAAT  
E S T S H V K K H L L S C F A V M G V P E K I K T D N G P G Y C S K A F Q K F L >  
"POL RF2" >

5770 5780 5790 5800 5810 5820 5830 5840 5850 5860 5870 5880  
AATCAGTGGAAATATTACACATACAACAGGAATCCCTATAATCCCAAGGACAGCCATAGTGTAAAGAACTAATAGAACACTCAAATTAATTAACAAAAAAGGGGGAGAG  
TTAGTCACTTAAATGTTGATGTTGCTTAAAGGAATTAAGGGTTCCTGTCGGTATCAACTTTCTGATTATCTTGTGAGTTTTGAGTTAATTAATTTGTTTTTTTCCCTCTG  
N Q W N I T H T T G I P Y N S Q G Q A I V E R T N R T L K T Q L I K Q K K G G D >  
"POL RF2" >

5890 5900 5910 5920 5930 5940 5950 5960 5970 5980 5990 6000  
AGTAAGGATATACCCTCCTCAGATGCAGCTTAATCTAGCACTCTATCTTTAAATTTTTTAAACATTTATAGAATGAGACTACTACTCTGCAGAACACATCTTACTGGTAAATTA  
TCAATCTCATATGGTGGAGGAGTCTACGTCGAATTAGATCGTGAGATAGAAATTTAAAAATTTGTAATATCTTAGTCTGATGATGAAGACGCTTGTGTTAGAAATGACCATTTTTC  
S K E Y T T P Q M Q L N L A L Y T L N F L N I Y R N Q T T T S A E Q H L T G K K >  
"POL RF2" >

6010 6020 6030 6040 6050 6060 6070 6080 6090 6100 6110 6120  
AACAGTCCACATGAAGAAAACGATTTGGTGGAAAGACAACAAAAATAAGACATGGGAAATAGGGAAGGTGATAAACCCTGGGGAAGAGTTTTGCTTGTGTTTCCACAGGAGAAAAATCAG  
TTGTCAGGTGACTTCTTTTGAACCACTTTCTGTTGTTTTTATCTGTACCTTTATCCCTTCCACTATTGGACCCCTTCCAAAAACGACAAAAAGTGGTCTCTTTTAGTC  
N S P H E G K L I W W K D N K N K T W E I G K V I T W G R G F A C V S P G E N Q >  
"POL RF2" >

6130 6140 6150 6160 6170 6180 6190 6200 6210 6220 6230 6240  
CTTCTGTTTGGATACCCTAAACATTTGAAGTCTACAATGAACCCATCGGAGATGCAAGAAAAGCCCTCCACGGAGACAGAACAACCCCAATCGAGCACCATTGACTCGCATGAT  
GAAGGACAAACCTATGGTGATTTGTAACCTCAAGATGTTACTTGGGTAGCCTCTACGTTCTTTTTCGGGAGGTGCCTCTGTCTTTGTCGCTTAGCTCGTGGTAACTGAGCGTACTA  
L P V W I P T K H L K F Y N E P I G D A K K S A S T E T E T P Q S S T I D S H D >  
"POL RF2" >  
M N P S E M Q R K A P P R R Q K H R N R A P L T R M M >  
"ENV" >

6250 6260 6270 6280 6290 6300 6310 6320 6330 6340 6350 6360  
GAACCAGTATGATATCAGAAGAAGATGAGTCAACCGCACCAAGAAAGCGGAGCTGCCGACCTGGGCACAGTTAAAGAAGCTGCACCCGTTAGCTGGAAAAAGCCTAGCTAGCAC  
CTTGGTTCACTATATGCTTTGCTTACTTCTCAGTGTGCTGTTCTTCCGCTCGACCGCTGGACCTGCAATTTCTCGACTGTGGCAATCGACCTTTTTCGGATCGATCGTG  
E P S D D I R R T D E V T T H Q E G G A A D L G T V K E A D T V S W K K P S \* H >  
"POL RF2" >  
N Q V M I S E E Q M K S P R T K K A E L P T W A Q L K K L T P L A G K S L A S T >  
"ENV" >

6370 6380 6390 6400 6410 6420 6430 6440 6450 6460 6470 6480  
AAAGGTGACACAAACCCAGAAAAATGCTGCTTACAGCTTTAATGATTTGATCAACGGTGGTAAAGTCTCCCCATGCTGCAGGAGCAGTGCAGCTAATTTATACCTACTGGCCTATGT  
TTCCACTGTGTTGGGCTTTTTTACGACGAATGTCAAATTAACAATAGTGTCCACCATTGAGAGGGGTACGGACGCTCCTCGTGCAGCTGATTAATATGATGACCCGGATACA  
K G D T N P R K N A A Y S F N D C I N G K S P H A C R S S C S \* >  
"POL RF2" >  
K V T Q T P E K M L L T A L M I V S T V V S L P M P A G A A A A N Y T Y W A Y V >  
"ENV" >

6490 6500 6510 6520 6530 6540 6550 6560 6570 6580 6590 6600  
GCCTTTCCGCCCTTAATTCGGGCGTTACATGGATGGATAATCCTATTGAAGTATATGTTAATAAGTGTGTTGGTACCTGGTCCACAGATGATGTTGTCCTGCCAAACCGGAGGA  
CGGAAAGGGCGGAAATTAAGCCGCTCAATGTACTCTATTAGGATAACTCATATACAATTTATACACACCCATGGACCAGGGTGTCTACTAGCAACGGGACGGTTGGCCTCCT  
P F P P L I R A V T W M D N P I E V Y V N N S V W V P G P T D D R C P A K P E E >  
"ENV" >

6610 6620 6630 6640 6650 6660 6670 6680 6690 6700 6710 6720  
AGAAGGAATGATGATAAATTTCCATTTGGGTATCGTTATCCTCTATTGCTAGGGAGAGCACCAGGATGTTAATGCCTGCTATTCAAAATTTGGTGGTAGAAGTACCTACTGTGAG  
TCTTCTTACTACTATTTATAAAGGTAACCCATAGCAATAGGAGGATAAACCGGATCCCTCTCGTGGTCTACAATTAACGACGATAAGTTTTAACCAACCTCTCATGGATGACAGTC  
E G M M I N I S I G Y R Y P P I C L G R A P G C L M P A I Q N W L V E V P T V S >  
"ENV" >

6730 6740 6750 6760 6770 6780 6790 6800 6810 6820 6830 6840  
TCCACCAGTAGATTTACTTATCATATGGTAAAGCGAATGTCACTCAAACACAGGTAACATTTACAAGACTTTTCTTATCAAGATCATTAAAATTTAGGCCAAAAGGGAACCTTG  
AGGGTGGTCACTAAATGAATAGTGTACCATTCGCTTACAGTGTGTTGGTGTCCATTTGATAAATGTTCTGAAAAGAATAGTTTCTAGTAAATTTAAATCCGGTTTTCCCTTTGGAAC  
P T S R F T Y H M V S G M S L K K P Q V N Y L Q D F S Y Q R S L K F R P K G K P C >  
"ENV" >

6850 6860 6870 6880 6890 6900 6910 6920 6930 6940 6950 6960  
CCCCAAAGAGATTTCCAGAGAATCGAAGATTTAGTTTGGGAAGAATGTGTGGCCGATAGTGCAGTATATTACAACAAATACATTCGGAACAGTTATAGATTGGGCACCTAGAGGTC A

GGGGTTTCTCTAAAGTCTCTTAGCTTTCTAAATCAAACCTTCTTACACACCGGCTATCACGTCATAATGTTTTGTTATGTAAGCCTTGCAATATCTAACCCGTGGATCTCCAGT  
P K E I S R E S K D L V W E E C V A D S A V I L Q N N T F G T V I D W A P R G Q  
"ENV" >

6970 6980 6990 7000 7010 7020 7030 7040 7050 7060 7070 7080  
ATTCTACCACAATTGCACAGGACAACTCAATTCTGTCCAGTGCACAGTGTGAGTCCAACTGTTGACAGTGATTTAACGGAAAATTTAGATAAACATAAGCACAAAAAATTTACAGTCTTT  
TAAGATGGTGTAACTGTCTCTTTGAGTTAAGACAGGGTACAGTGCAGTCTCAGGTTGACAACTGCTACTAAATTCGCTTTTAAATCTATTGTATTGCGTGTCTTTTAAATGTCAGAAA  
F Y H N C T G Q T Q F C P S A L V S P T V D S D L T E N L D K H K H K K L Q S F >

"ENV" >

7090 7100 7110 7120 7130 7140 7150 7160 7170 7180 7190 7200  
CTACCCCTGGATATGGGGAGAAAAGGAATGTCTACTCCAAGACCAAAAATGATAAGTCTGTTTTGGTCTGAACATCCAGAATTATGGAGACTTACTGTGGCTTCATACCCGCTTAG  
GATGGGAACCTATACCCCTCTTTCCCTTACAGATGAGGTTCTGGTTTTACTATTGAGGACAAAACAGGACTTGTAGGCTTAATACCTCTGAATGACACCGAAGTATGGCGGAATC  
Y P W I W G E K G M S T P R P K M I S P V F G P E H P E L W R L T V A S Y R L R >

"ENV" >

7210 7220 7230 7240 7250 7260 7270 7280 7290 7300 7310 7320  
AATTTGGTCTGGAATCAAATATAGAAAACAGAGATTATAAGCCATTTTACTCTATCAACCTAAATCCAGTCTAACAGTTCCTTTACAAGTTGTGTAAGCCCCCTTATATGTTAGT  
TTAAACCAGACCTTTAGTTTATATCTTTGTTCTCTAAATTCGGTAAAATGAGATAGTTGGATTTAAGGTGACAGTTGCAAGGAAATGTTTCAACACATTTCCGGGGAATATACAATCA  
I W S G N Q T I E T R D Y K P F Y S I N L N S S L T V P L Q S C V K P P Y M L V >

"ENV" >

7330 7340 7350 7360 7370 7380 7390 7400 7410 7420 7430 7440  
CATAGGAAATATAGTTATTAACCCAGACTCCCAACTATAACTTGTGAAAATTCAGATGTTTACTTGCATTGATTCAACTTTTGATTGGCAGCACCGTATTTACTGTTGAGAGCAAG  
GTATCTTTATATCAATAATTTGGTCTGAGGGTTGATATTGAACACTTTTAACTGCTAACAATGAACGTAACCTAAGTTGAAAACCTAACCGCTGTCGTCATAAGATGACCACTCTCGTTC  
I G N I V I K P D S Q T I T C E N C R L F T C I D S T F D W Q H R I L L V R A R >

"ENV" >

7450 7460 7470 7480 7490 7500 7510 7520 7530 7540 7550 7560  
AGAAGCGTGTGGATCCCTGTGTCATGGACCGACCATGGGAGCGCTCACCATCCATCCATATTTTACTGAAAGTATAAAAGCGCTTTTAAAGTAGATCCAAAAGATTCAATTTTACTTT  
TCTTCCGCACACCTAGGGACACAGGTACCTGGCTGGTACCTCCGGAGTGGTAGGTAGGTATAAACTGACTTCAATTTTCCGCAAAATTCATCTAGGTTTTCTAAGTAAAAATGAAA  
E G V W I P V S M D R P W E A S P S I H I L T E V L K G V L S R S K R F I F T L >

"ENV" >

7570 7580 7590 7600 7610 7620 7630 7640 7650 7660 7670 7680  
AATTGACAGTATTATGGGATTAATTGCAGTACAGCTACAGCCCTGTGGCAGGAGTTGCAATTGACCTCTTCTGTTGACAGTAAAGCTTTGTTGACAATTTGGCAAAGAAATCCACAAG  
TTAAGCTCACTAATCCCTAATTAACGTGAGTGCATGTCGGAGACACCGCTCCTCAACGTAACGTGAGAAGACAAGTCTGTCATTGAAACAACCTGTTAACCGTTTTCTTAAGGTGTTT  
I A V I M G L I A V T A T A S V A G V A L H S S V Q T V S F V D N W Q K N S T R >

"ENV" >

7690 7700 7710 7720 7730 7740 7750 7760 7770 7780 7790 7800  
GTTGGAATTCACAATCTGGTATCGATCAAAAATTTGGCAAATCAAATTAATGATCTTAGACAAACCGTCAATTGGATGGGAGATAGACTCATGAGCTTGGAAACATCGTTTCCAGTTACA  
CAACCTTAAGTGTAGCCATAGCTAGTTTTTAAACGTTTAACTTAACTAGACTGTTTGGCAGTAAACCTACCCTATCTGAGTACTGAACTTGTGAGAAAGTCAATGTT  
L W N S Q S G I D Q K L A N Q I N D L R Q T V I W M G D R L M S L E H R F Q L Q >

"ENV" >

7810 7820 7830 7840 7850 7860 7870 7880 7890 7900 7910 7920  
GTGTGACTGGAATACGTGAGATTTTGTATTACACCCCAAGTTTATAATGAGTCAAACTACTGGGACATGGTTAGACGCCATCTACAGGGAAGAGAAGATATCTCACTTTAGACT  
CACACTTATGACAGTCAAAAACATAATGGGGTTCAAATATTACTAGATTTGAGTACCGCTGACCAACTCTGCGGTAGATGTCCTTCTTATTAGAGTGAATCTGTGA  
C D W N T S D F C I T P Q V Y N E S K H H W D M V R R H L Q G R E D N L T L D I >

"ENV" >

7930 7940 7950 7960 7970 7980 7990 8000 8010 8020 8030 8040  
TTCTAAATAAAAGAACAAATTTTGAAGCCTCTCAAAGCCACTTAAATATTGTGCCTGGAGCTGAGGCATTAGATCAAGTGGCAAATACTTTTGAATTAACCCACGACTTGGAT  
AAGATTTAATTTTCTGTTTAAAAGCTTGGGAGTTTTGAGTGAATTTAACAACGAGCTTAACTGCAACAGGACCTCGACTCCGTAATCTAGTTTACCCTTTTGAATACTTAAATTTGGGGTGTGAACCTA  
S K L K E Q I F E A S Q S H L N I V P G A E A L D Q V A K N L Y E L N P T T W I >

"ENV" >

8050 8060 8070 8080 8090 8100 8110 8120 8130 8140 8150 8160  
TAAGTCTATTGGAACCTACTGCAATAAATTTTGAATTTATGTTCTCTGTTAATCAGCTTGTTTTTAGTGTGCTGGACAGTGAAGAATCCTGCGTCAAAATCCGAGAGAACGAACA  
ATTGAGATAACCTTTGAGATGACGTTTAAAACCTTAAACACAGAGACAAATAGTGAACAAATAACACAGGACCTCGACTCCGTAATCTAGTTTACCCTTCTTAGGACGCTTTTACTGTTGTT  
K S I G N S T A I N F G I M C L C L I S L F L V C W T S R R I L R Q N R E N E Q >

"ENV" >

8170 8180 8190 8200 8210 8220 8230 8240 8250 8260 8270 8280  
AGCCTTCACTGCCATGGCATTATATAGAGAAAAGGGAGGAGACCTGTCGGGAAAGTCAAGGACCTTGAACGACGGGACTGGCTGAAGCCACGGCAGAAAACATAAAATGTAAG  
TCGGAAGTAGCGGTACCGTGAATAATATCTCTTTTCCCTCCCTTGAACGCTTCAAGTCCCTGGAACCTTGGCTCCCTGACCGACTTCCGTCGCCCTTTTGTATTTTACATTTT  
A F I A M A H L Y R G K G R E N V A G S Q G P \* >

"ENV" >

8290 8300 8310 8320 8330 8340 8350 8360 8370 8380 8390 8400  
ATTCATGGACATTTATAGTTCTCCAAAATTAATACTTTTGAATTTCTTATGCTGTCTTTACTTTAATCTTTTAAATCCATCATCTTCTTTGTAACCTGAGGAGGATATATGTCACC  
TAAAGTACCTGTAATAATCAAGAGTTTTAATATGAAAACATTAAGAATACAGACAGAAATGAAATTAGAAAATTAAGGTAGTAGAAGAACAATTTGACTCCTCTATATACAGTGG  
8410 8420 8430 8440 8450 8460 8470 8480 8490 8500 8510 8520  
TCCGGACCTGTGATGATTGCCCTTAACTGCACAAATGTTTGTGGAGCATGTGTTTGAACAATATGAAATCTGGGCATCTTGGAAAAAGAATAAGATAACAGCAATGTTCCAGGGAACA  
AGGCTGGGACACTACTAACCGAATTGACGTGTTTAAACAACACCTCGTACACACAACTTGTATACTTTAGACCCGTAGAACCTTTTCTTATTCTATTGCTGTACAAAGTCCCTTGT  
8530 8540 8550 8560 8570 8580 8590 8600 8610 8620 8630 8640  
AGGGAGGCAACCTTGAACCTGGCCGCGGTGAGCCGACGGAACAGAGCCATATTTCTTCTTTTCAATATGCAAAATAGGAGAAATATCGCTGAATCTTTTCTCAGCAAGGAACACCC  
TCCCTCCGTTGAACTTGACCGCGCCACTCGGCCTGCCTGTCTCGGATAAAGAAGAGAAAAGTAATACGTTTATCCTCTTTATAGCGACTTAAGAAAAAGAGTCTTCTTGTGGG  
8650 8660 8670 8680 8690 8700 8710 8720 8730 8740 8750 8760  
CTGAGAAGAGAAATGCGCTCTGAGGTTAGGCCCTATAAACGACCCCTTGGAGGCTGCGCCTTTTACGGTTGAAGCCGAAGGGATGAAAATAAGCCCGCCCTCTGTAGCGCTCCAGG  
GACTCTTTCTTACGCGAGACTCCCATCCGATATTTGCTGGGGAACTCCGCACGGCGAAAATGCCAACTTCGGCTTCCCTACTTTATTCCGGGCGCGAGACATCGGAGGTTCC  
8770 8780 8790 8800 8810 8820 8830 8840 8850 8860 8870 8880  
CTTATTAGGACGAGGAAATCCCACTAATAAATTTTGGTCCAGACAGGTTGCTGCTCTTAAACCTGTTTTCTGACAAGATGTTATCCATGACTATGCATGCCCAAAAATTTAATTTT  
GAATAATCTGCTCCTTAAAGGTGGATTTTAAAACAGTCTGTCCAACAGACGAGAATTTGGGCAAAAAGACTGTTCTACAATAGGTAAGTACTGATACGTCAGGGTTTTAAAATTTAAA  
8890 8900 8910 8920 8930 8940 8950 8960 8970 8980 8990 9000

AACACCATCCTGTGATCTCATCCTGCCTCCACTTGCTTTGTGATATTCCGTTACTTTGTGAAGTATGTAATCTCGGTGTCATGATGACAATGGTGGTTTTGTTGAAAAGAAAAGGGGGAA  
TTGTGGTAGGACACTAGAGTAGGACGGAGGTGAACGAAACACTATAAGGCAATGAAACACTTCATACATTAGAGCCACAGTACTACTGTTACCACCAAAAACAACCTTTTCTTTCCCTT

9010 9020 9030 9040 9050 9060 9070 9080 9090 9100 9110 9120  
ATGTGGGAAAAGAAAGAGATCAGCCTGTTACTGTGTCTATATAGAAGAAGTAGACATAAGAGACTCCATCTTGTCTGTATTTGAGATGCTGTTAATCTGTGACCCTACCCCAACCT  
TACACCCCTTTCTTTCTCTAGTCGGACAATGACACAGATATATCTTTCTTCATCTGTATTCTCTGAGGTAGAACAGACATAAACTCTACGACAATTAGACTGGGATGGGGTTGGA  
"3'LTR" >

9130 9140 9150 9160 9170 9180 9190 9200 9210 9220 9230 9240  
TGTCTTGCAAGAGACATGTGCTGTGGTAACTCAAGGTTAATGGATTTTGGGCGTGCAGGGTGTGACTTTGTTCCTAGAAAAGCTAGGTATTGTCCAAGGTTTATCCCATGTGATAGG  
ACAGGAACGTTCTCTGTACACGACACCATTGAGTTCCAAATTACCTAAAACCCGCAGTCCCACACTGAAACAAGGATCTTTTCGATCCATAACAGGTTCCAAATAGGGGTACACTATCC  
"3'LTR" >

9250 9260 9270 9280 9290 9300 9310 9320 9330 9340 9350 9360  
ATGAAAACATGTTGCTAAAAGGTTTATCTCAAGGCACAGGATTTACCTTTAACTTATTTCATGTACAGATCCTTGTCTTATGCTTACTGCTAATTTCTCCCTAAAAATGATCCTAT  
TACTTTGTTACAACGATTTTCAAATAGAGTTCCTGTCCATAATGGAAATTTGAATAAGTACAGTGTCTAGGAACAAGAATACAGAATGACGATTAAAGGAGGGATTTTACTAGGATA  
"3'LTR" >

9370 9380 9390 9400 9410 9420 9430 9440 9450 9460 9470 9480  
TGTCTTGCCACTCCCTTATCTTTAAGATGGTAAGATAATTATCTATAAAATACTAAGGGAACCTCAGAGGCCGGTGCCGGCGTGGGTCTCTGTAAGCTGAGCGCCGGTCCCCTGGGCCCC  
ACAGGACGGTGAGGGAATAGAAATTTACCATTTCTATTAAATAGATTTTATGATTTCCCTTGAGTCTCCGGCCACGGCCGACCCAGGAGACATTCGACTCGCGCCAGGGGACCCGGGG  
"3'LTR" >

9490 9500 9510 9520 9530 9540 9550 9560 9570 9580  
CGCTTTTCTTTCTCTATACTTTGTCTGTGCTTATTTCTTTTCTCAAGTCTCTCGTTCCACCTTACGAGAAACACCCACAGGTGTGGAGGGGCAGGCCACCCCTTCA  
GCGAAAAGAAAGAGATAGAAACAGAGACACAGAATAAAGAAAAGGTTTCAGAGAGCAAGGTGGAATGCTCTTTGTGGGTGCCACACTCCCCTCCGGTGGGGAAGT  
"3'LTR" >
