# Supplementary material for: Identification and spontaneous immune targeting of an endogenous retrovirus K envelope protein in the Indian rhesus macaque model of human disease
Source: PubMed Central journal article supplement (PMC4714462; doi:10.1186/s12977-016-0238-0), 2016-01-15
Supplement: 12977_2016_238_MOESM2_ESM.pdf [file 12977_2016_238_MOESM2_ESM.pdf]

**Figure S2. Alignment of captured SERV-K1 Env mRNA to SERV-K1 provirus.** Protein alignment of the predicted amino acid sequence of chromosome 12 provirus and two mRNA variants captured from rhesus macaque r02120 is shown. Matches at each amino acid position are indicated with asterisks (\*), while mismatches are indicated with periods (.). Mismatches in each sequence are highlighted in yellow.

```

r02120 provirus (12) 1 MNPSEMQRKAPRRQKHRNRAPLTRMMNQVMISEEQMKSPRTKKAELPTWAQLKKLTPLA 60
r02120 Env mRNA v1 1 MNPSEMQRKAPRRQKHRNRAPLTRMMNQVMISEEQMKSPRTKKAELPTWAQLKKLTPLA 60
r02120 Env mRNA v2 1 0

r02120 provirus (12) 61 GKSLASTKVTQTPEKMLLTALMIVSTVVSLPMPAGAAAANYTYWAYVFPPLIRAVTWMD 120
r02120 Env mRNA v1 61 GKSLASTKVTQTPEKMLLTALMIVSTVVSLPMPAGAAAANYTYWAYVFPPLIRAVTWMD 120
r02120 Env mRNA v2 1 PMPAGAAAANYTYWAYVFPPLIRAVTWMD 30
*****

r02120 provirus (12) 121 NPIEVVYVNSVWVPGPTDDRCPAKPEEEGMMINISIGYRYPPLICLGRAPGCLMPAIQNWL 180
r02120 Env mRNA v1 121 NPIEVVYVNSVWVPGPTDDRCPAKPEEEGMMINISIGYRYPPLICLGRAPGCLMPAIQNWL 180
r02120 Env mRNA v2 31 NPIEVVYVNSVWVPGPTDDRCPAKPEEEGMMINISIGYRYPPLICLGRAPGCLMPAIQNWL 90
*****

r02120 provirus (12) 181 VEVPTVSPTSRTFYTHMVSGMSLKPQVNYLQDFSYQRSCLKFRPKGKPCPKPEISRESKDLVW 240
r02120 Env mRNA v1 181 VEVPTVSPTSRTFYTHMVSGMSLKPQVNYLQDFSYQRSCLKFRPKGKPCPKPEISRESKDLVW 240
r02120 Env mRNA v2 91 VEVPTVSPTSRTFYTHMVSGMSLKPQVNYLQDFSYQRSCLKFRPKGKPCPKPEISRESKDLVW 150
*****

r02120 provirus (12) 241 EECVADSAVILQNNTFGTVIDWAPRGQFYHNCTGQTQFCPSALVSPTVSDLTENLDKHK 300
r02120 Env mRNA v1 241 EECVADSAVILQNNTFGTVIDWAPRGQFYHNCTGQTQFCPSALVSPTVSDLTENLDKHK 300
r02120 Env mRNA v2 151 EECVADSAVILQNNTFGTVIDWAPRGQFYHNCTGQTQFCPSALVSPTVSDLTENLDKHK 210
*****

r02120 provirus (12) 301 HKKLQSFYPWIWGEKGMSTPRPKMISPVFGPEHPELWRLTVASYRLRIWGSNQTIIETRDY 360
r02120 Env mRNA v1 301 HKKLQSFYPWIWGEKGIISTPRPKMISPVFGPEHPELWRLTVASYRLRIWGSNQTIIETRDY 360
r02120 Env mRNA v2 211 HKKLQSFYPWIWGEKGMSTPRPKMISPVFGPEHPELWRLTVASYRLRIWGSNQTIIETRDY 270
*****

r02120 provirus (12) 361 KPFYSINLNSSLTVPLQSCVKPPYMLVIGNIVIKPDSQTITCENCRFLTICIDSTFDWQHR 420
r02120 Env mRNA v1 361 KPFYSINLNSSLTVPLQSCVKPPYMLVIGNIVIKPDSQTITCENCRFLTICIDSTFDWQHR 420
r02120 Env mRNA v2 271 KPFYSINLNSSLTVPLQSCVKPPYMLVIGNIVIKPDSQTITCENCRFLTICIDSTFDWQHR 330
*****

r02120 provirus (12) 421 ILLVRAREGVWIPVSMDRPWEASPSIHILTEVLKGVLSRSKRIFFTLIAVIMGLIAVTAT 480
r02120 Env mRNA v1 421 ILLVRAREGVWIPVSMDRPWEASPSIHILTEVLKGVLSRSKRIFFTLIAVIMGLIAVTAT 480
r02120 Env mRNA v2 331 ILLVRAREGVWIPVSMDRPWEASPSIHILTEVLKGVLSRSKRIFFTLIAVIMGLIAVTAT 390
*****

r02120 provirus (12) 481 ASVAGVALHSSVQTVSFVDNWQKNSTRLWNSQSGIDQKLANQINDLRQTVIWMGDRLMSL 540
r02120 Env mRNA v1 481 ATVAGVALHSSVQTVSFVDNWQKNSTRLWNSQSGIDQKLANQINDLRQTVIWMGDRLMSL 540
r02120 Env mRNA v2 391 ASVAGVALHSSVQTVSFVDNWQKNSTRLWNSQSGIDQKLANQINDLRQTVIWMGDRLMSL 450
* . *****

r02120 provirus (12) 541 EHRFQLQCDWNTSDFCITPQVYNESKHHWDMVRRHLQGREDNLTLDISKLKEQIFEASQS 600
r02120 Env mRNA v1 541 EHRFQLQCDWNTSDFCIIPQVYNESKHHWDMVRRHLQGREDNLTLDISKLKEQIFEASQS 600
r02120 Env mRNA v2 451 EHRFQLQCDWNTSDFCITPQVYNESKHHWDMVRRHLQGREDNLTLDISKLKEQIFEASQS 510
*****

r02120 provirus (12) 601 HLNIVPGAALDQVAKNLYELNPTTWIKSIGNSTAINFGIMCLCLISLFLVCWTSRRILR 660
r02120 Env mRNA v1 601 HLNIVPGAALDQVAKNLYELNPTTWIKSIGNSTAINFGIMCLCLIGLFLVCWTSRRILR 660
r02120 Env mRNA v2 511 HLNIVPGAALDQVAKNLYELNPTTWIKSIGNSTAINFGIMCLCLISLFLVCWTSRRILR 570
*****

r02120 provirus (12) 661 QNRENEQAFIAMAHLYRGKGRENVAGSQGP 690
r02120 Env mRNA v1 661 QNRENEQAFIAMAHLYRGKGRENVAGSQGP 690
r02120 Env mRNA v2 571 QNRENEQAFIAMAHLYRGKGRENVAGSQGP 600
*****

```
