# Supplementary material for: Identification and spontaneous immune targeting of an endogenous retrovirus K envelope protein in the Indian rhesus macaque model of human disease
Source: PubMed Central journal article supplement (PMC4714462; doi:10.1186/s12977-016-0238-0), 2016-01-15
Supplement: 12977_2016_238_MOESM3_ESM.pdf [file 12977_2016_238_MOESM3_ESM.pdf]

CERV-KOLD35587 480 GACAAATTAATGACTGTTACACATTTCTGCAGACAGAGGTTGCAACCGCAGGACTGACGACAGCATCTGATAAGATTCAAACCTCTACTCCTTTCCATTA... 599

CERV-KOLD35587 600 GAAATGAAAATTAACCCACAAAAAATAGAAATTAAGAAAAGACACATTAACAACTTAAGTACTTTCAAAAATGCTAGGAGATTAATTGGATTGAGCACTCTAGGCATCTCTACT... 719

CERV-KOLD35587 720 TATGCCATGTCAAATTTGTTCTCTATCTTAAGAGGGGATCCAGAATGAATAGTAAAAGAACATTAACCCAGAGCACTAAAGAAATGAATTAGTGAAGAAAAAATTCGGTCAGCA... 839

CERV-KOLD35587 840 CAAGTAAATAGAAATGATGACTTACGCCCACTCCAACCTTTGATTTTGGCTACTGCACATTTCCAACAGGCATATTGTTCAAAATACAGATCTTGTGGAGTGGTCTTCCTCTCTAC... 959
