# Supplementary material for: Identification and spontaneous immune targeting of an endogenous retrovirus K envelope protein in the Indian rhesus macaque model of human disease
Source: PubMed Central journal article supplement (PMC4714462; doi:10.1186/s12977-016-0238-0), 2016-01-15
Supplement: 12977_2016_238_MOESM5_ESM.pdf [file 12977_2016_238_MOESM5_ESM.pdf]

**Figure S5. Alignments of SERV-K1 Env T cell epitopes to SIVmac239 Env peptides. (a)** Amino acid alignment of r02120 CD4+ T cell epitope SERV-K1 Env LL15 to SIVmac239 Env LL15. This is the only SIVmac239 Env peptide with 10 or less mismatches to SERV-K1 Env LL15. **(b)** Amino acid alignment of r02120 CD8+ T cell epitope SERV-K1 Env PA8 to SIVmac239 Env PC8 and AQ8. These are the only SIVmac239 Env peptides with 5 or less mismatches to SERV-K1 Env PA8. For both (a) and (b), matches to the SERV-K1 Env peptide are shown as dashes.

**a**

|                              |                 |
|------------------------------|-----------------|
| <b>SERV-K1 Env 526-540</b>   | LRQTVIWMGDRLMSL |
| <b>SIVmac239 Env 703-717</b> | -LRI--YIVQM-AK- |

**b**

|                              |           |
|------------------------------|-----------|
| <b>SERV-K1 Env 109-115</b>   | PFPPPLIRA |
| <b>SIVmac239 Env 236-243</b> | -GYA-L-C  |
| <b>SIVmac239 Env 865-872</b> | AI-RR--Q  |
